# Supplementary material for: Synteny conservation between two distantly-related Rosaceae genomes: Prunus (the stone fruits) and Fragaria (the strawberry)
Source: PubMed Central journal article supplement (PMC2442709; doi:10.1186/1471-2229-8-67), 2008-06-18

### FG1

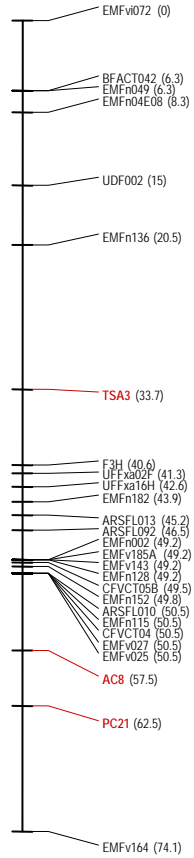

### FG2

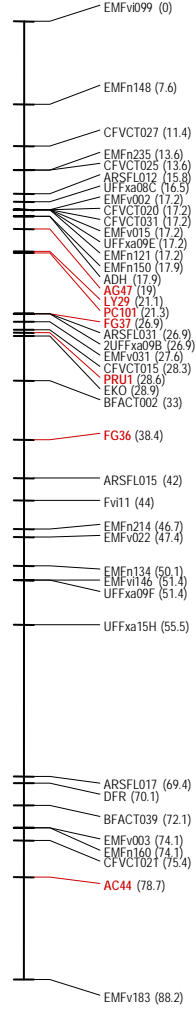

### FG3

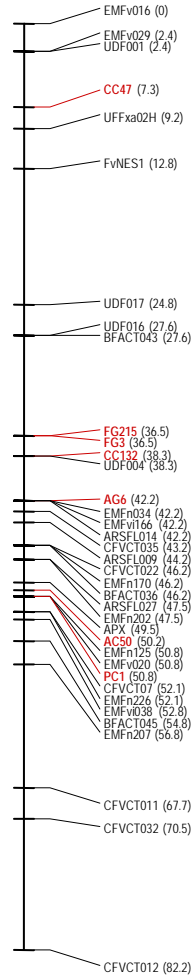

### FG4

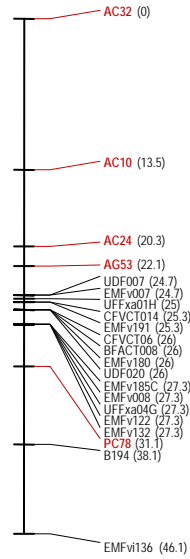

### FG5

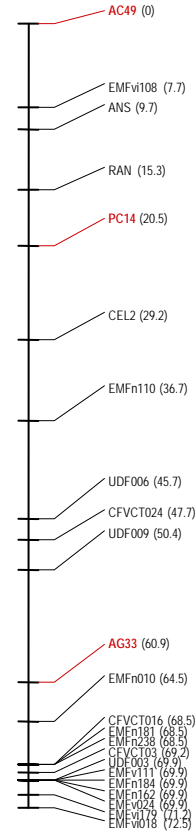

### FG6

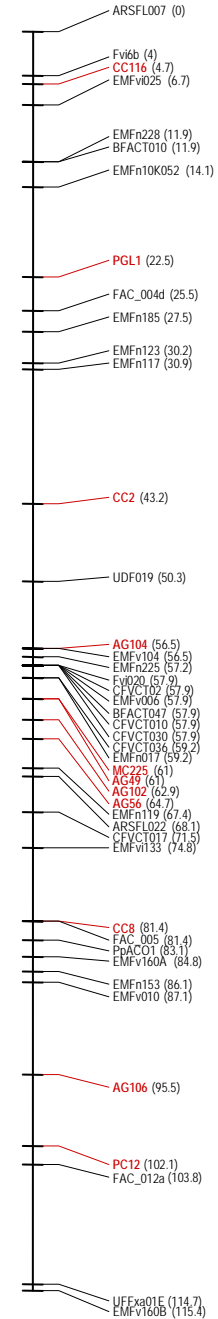

### FG7

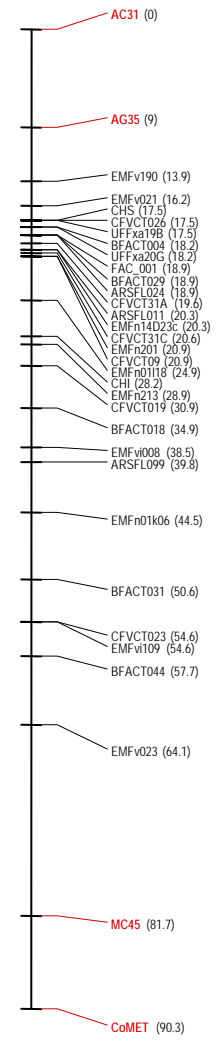

Supplement: 1471-2229-8-67-S1.pdf [file 1471-2229-8-67-S1.pdf]
